# Supplementary material for: Inflammatory Immune Responses in Patients with Tick-Borne Encephalitis: Dynamics and Association with the Outcome of the Disease
Source: MDPI journal article supplement (doi:10.3390/microorganisms7110514), 2019-10-31
Supplement: s1 [file s1]

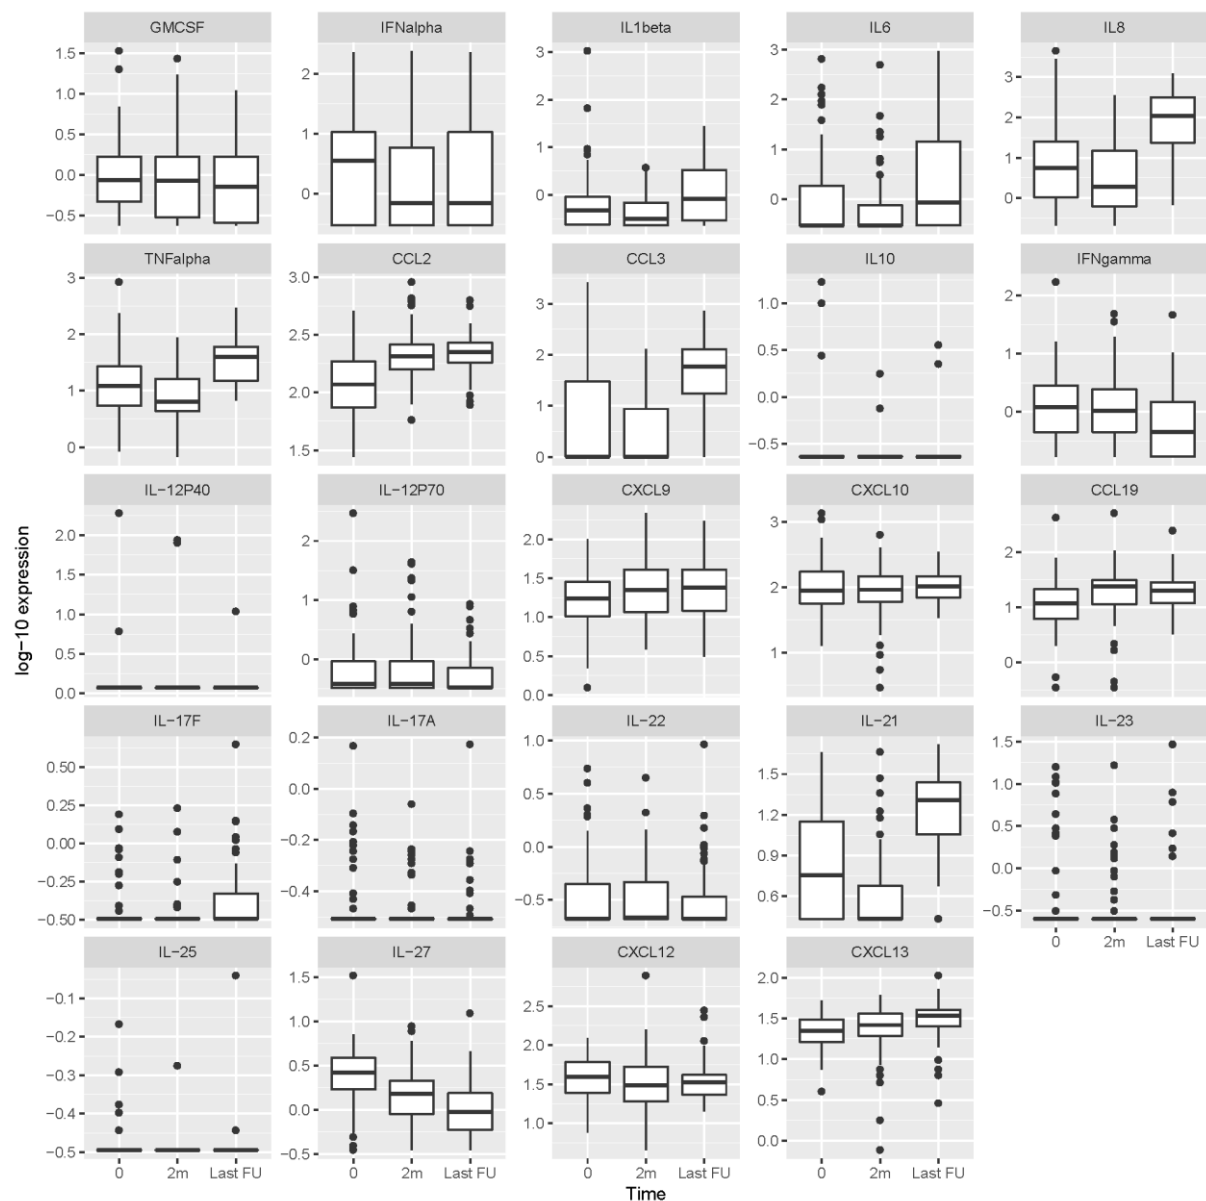

**Supplementary Figure 1.** Concentrations of inflammatory immune markers in serum of patients with tick-borne encephalitis at the time of acute illness (up to 14 days from the beginning of meningoencephalitic phase of the disease), 2 months later, and 2–7 years after the onset of the disease. Concentrations are in ng/mL for IL-17F, IL-23, IL-25 and IL-27, and in pg/mL for all other inflammatory immune mediators. Last FU = last follow-up visit (2–7 years after the onset of tick-borne encephalitis)
